# Supplementary material
Source: PubMed Central journal article supplement (PMC5440649)
Supplement: MCB.00079-17_zmb011171490s4.pdf [file MCB.00079-17_zmb011171490s4.pdf]

1 **Inventory of Supplemental Information**

2 **SUPPLEMENTAL FIGURES**

3 Figure S1 is related to Figure 2.

4 Figure S2 is related to Figure 4.

5 Figure S3 is related to Figure 4.

6 Figure S4 is related to Figure 5.

7 Figure S5 is related to Figure 5.

8 Figure S6 is related to Figure 6.

9 **SUPPLEMENTAL TABLES**

10 Table S1 is related to Figure 3, and is provided as a separate Excel file.

11 Table S2 is related to Figure 3, and is provided as a separate Excel file.

12 Table S3 is related to Figure 6, and is provided as a separate Excel file.

13

14 SUPPLEMENTAL FIGURES

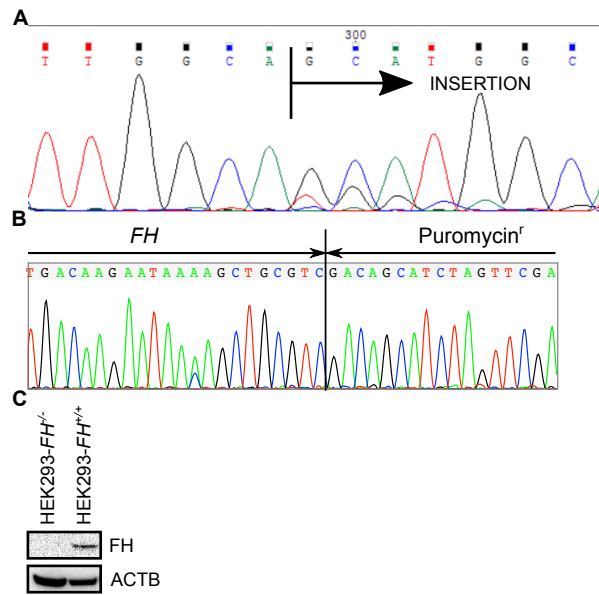

15

16 **Figure S1, related to Figure 2.** HEK293-*FH*<sup>-/-</sup> validation.

17 A-B. Exon 6 was isolated by PCR from HEK293-*FH*<sup>-/-</sup> gDNA. Two PCR products were identified. Genomic

18 analysis of HEK293-*FH*<sup>-/-</sup> revealed an insertion (A) in one PCR product and a puromycin resistance

19 cassette in the other PCR product (B).

20 C. Western blot analysis of HEK293-*FH*<sup>-/-</sup> show no FH protein compared to wildtype HEK293.

21

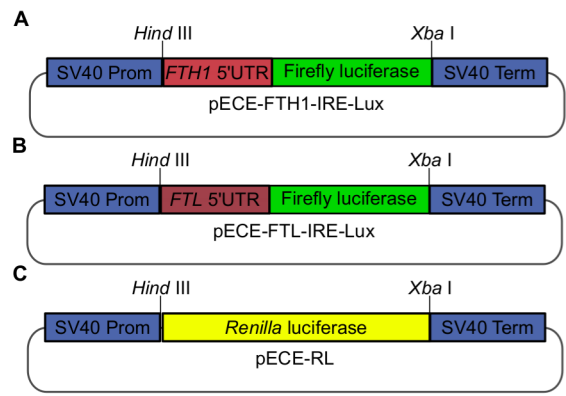

22

23 **Figure S2, related to Figure 4.** Luciferase construction vector maps.

- 24 A. Vector construction of pECE-FTH1-IRE-LUX. The 5' untranslated region (UTR) of FTH1 mRNA,  
 25 which contains an Iron Response Element under the repressional control of Iron Regulatory Proteins, was  
 26 placed in front of a firefly luciferase open reading frame, effectively placing the luciferase under Iron  
 27 Regulatory Protein control. SV40 is a constitutive promoter, removing any transcriptional regulation.
- 28 B. Vector construction of pECE-FTL-IRE-LUX. The 5' untranslated region (UTR) of FTL mRNA, which  
 29 contains an Iron Response Element under the repressional control of Iron Regulatory Proteins, was  
 30 placed in front of a firefly luciferase open reading frame, effectively placing the luciferase under Iron  
 31 Regulatory Protein control. SV40 is a constitutive promoter, removing any transcriptional regulation.
- 32 C. Vector construction of pECE-RL. *Renilla* luciferase open reading frame was placed directly behind the  
 33 constitutive SV40 promoter, reducing any transcriptional or translational control elements from its  
 34 production. pECE-RL was used as a transfection control.

35

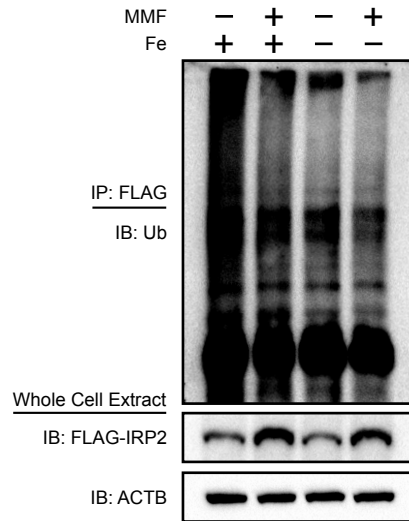

36

37 **Figure S3, related to Figure 4.** IRP2 ubiquitylation is decreased by MMF.

38 Ubiquitylation of N-terminal flag-tagged IRP2. The day after transfection with flag-tagged IRP2 (N-Flag-IRP2  
 39 construct), HEK293 cells were treated with 80  $\mu$ M monomethyl fumarate (MMF) (+) or vehicle control (-) for 2  
 40 days. MMF media was refreshed after 24 hours. After two days of MMF treatment, all cells were treated with 10  
 41  $\mu$ M MG132; additionally, indicated cells were co-treated with 200  $\mu$ M Fe (or vehicle) and/or 80  $\mu$ M MMF (or  
 42 vehicle). 4 hours after treatment, cells were harvested for protein. Protein was normalized, and lysates were split  
 43 into whole cell extract for SDS-PAGE analysis or immunoprecipitation using anti-Flag conjugated beads.  
 44 Following overnight incubation, immunoprecipitated product was prepared for SDS-PAGE analysis. All samples  
 45 were resolved on SDS-PAGE and analyzed by Western blotting. IP=Immunoprecipitated product.

46

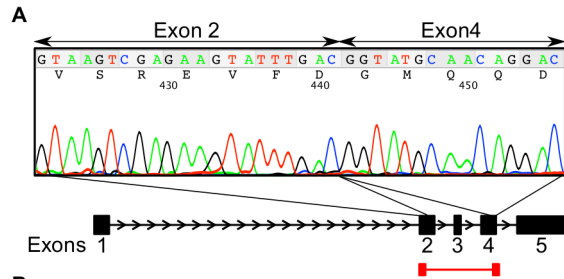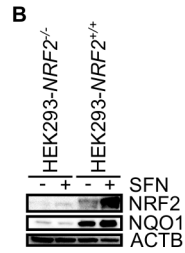

47

48 **Figure S4, related to Figure 5.** Validation of HEK293-*NRF2*<sup>-/-</sup>.

49 A. *NRF2* was isolated by PCR from HEK293-*NRF2*<sup>-/-</sup> gDNA. Genomic analysis of HEK293-*NRF2*<sup>-/-</sup> revealed  
 50 a large deletion of DNA between exons 2 and 4.

51 B. Western blot analysis of HEK293-*NRF2*<sup>-/-</sup> revealed an absence of NRF2 protein and the canonical NRF2  
 52 target gene NQO1 compared to wildtype HEK293. Additionally, 4 μM of the strong NRF2 activator  
 53 sulforaphane (SFN), was able to induce NRF2 and NQO1 in wildtype cells, but not in the *NRF2*<sup>-/-</sup> cells.

54

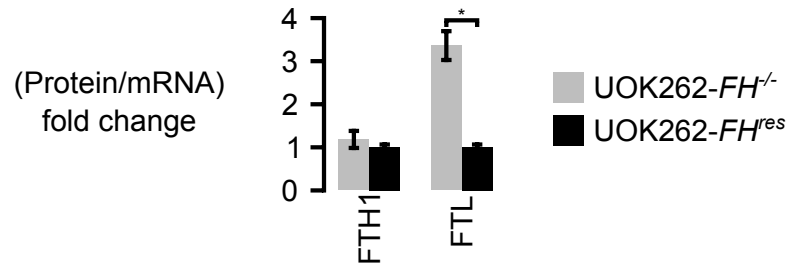

55

56 **Figure S5, related to Figure 5.** Translation of FTL and FTH1 in UOK262-*FH*<sup>-/-</sup> and UOK262-*FH*<sup>res</sup>.

57 Densitometry quantitation of FTL and FTH1 protein was conducted on UOK262-*FH*<sup>-/-</sup> and UOK262-*FH*<sup>res</sup>

58 immunoblots, using ACTB as a loading/normalization control. Relative fold changes in protein level were divided

59 by relative fold changes in mRNA levels within each cell type. \* represents  $p < 0.05$  by student's t-test calculated

60 from 3 independent sets of experiments.

61

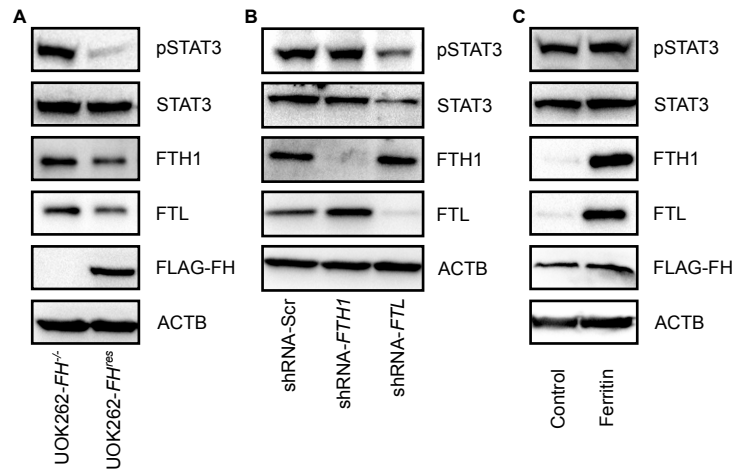

62

63 **Figure S6, related to Figure 6.** STAT3 signaling is altered in UOK262-*FH*<sup>-/-</sup> versus UOK262-*FH*<sup>res</sup>, but ferritin  
 64 overexpression or knockdown cannot alter STAT3 signaling.

- 65 A. Western blot of UOK262-*FH*<sup>-/-</sup> and UOK262-*FH*<sup>res</sup> show a change in STAT3 phosphorylation level.  
 66 B. Western blot of UOK262 cells transduced with shRNAs targeting *FTH1* show no change in STAT3  
 67 signaling relative to shRNA-Scr (a nontargeting shRNA control). shRNA targeting *FTL* show decreases in  
 68 both total STAT3 and pSTAT3.  
 69 C. Western blot of UOK262-*FH*<sup>res</sup> cells transduced with pLKO-CMV empty vector (Control) or pLKO-CMV-  
 70 FTL and pLKO-CMV-FTH1 (Ferritin) show no change in STAT3 signaling with ferritin overexpression.

71

72 **SUPPLEMENTAL TABLES**

73 **Table S1, related to Figure 3.** Proteomics analysis of IRP2. Table S1 is provided as a separate Excel file.

74



75 **Table S2, related to Figure 3.** Proteomics analysis of IRP2-A523R. Table S2 is provided as a separate Excel file.

76

77 **Table S3, related to Figure 6.** Differentially expressed genes between HLRCC kidney tumors and normal kidney  
78 tissues. Table S3 is provided as a separate Excel file.
